# Supplementary material
Source: PubMed Central journal article supplement (PMC3791374)

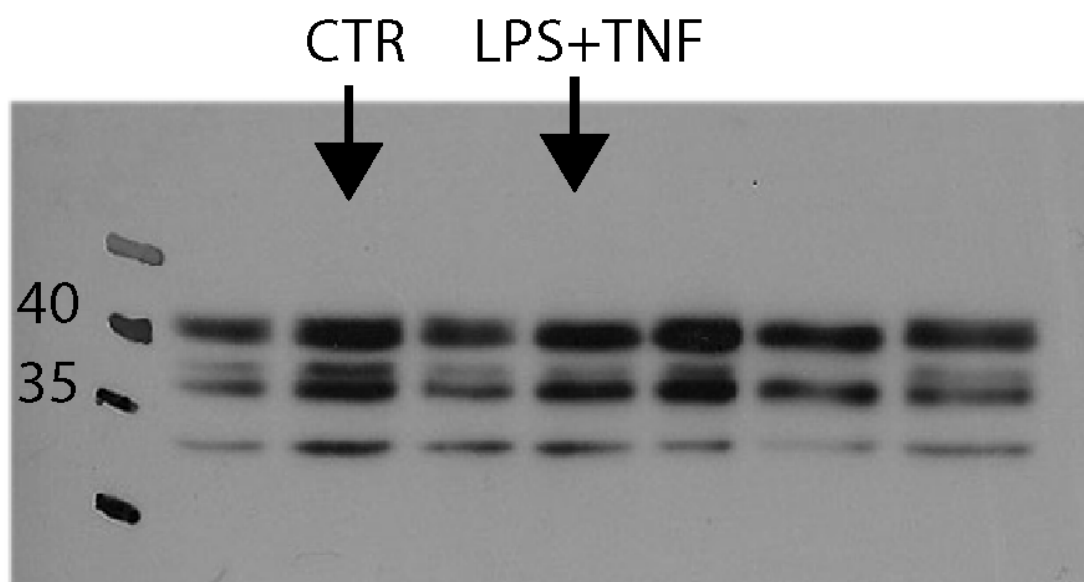

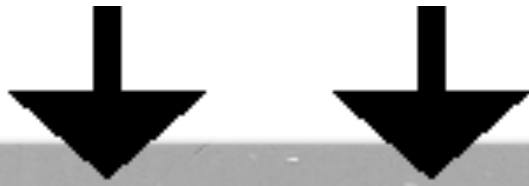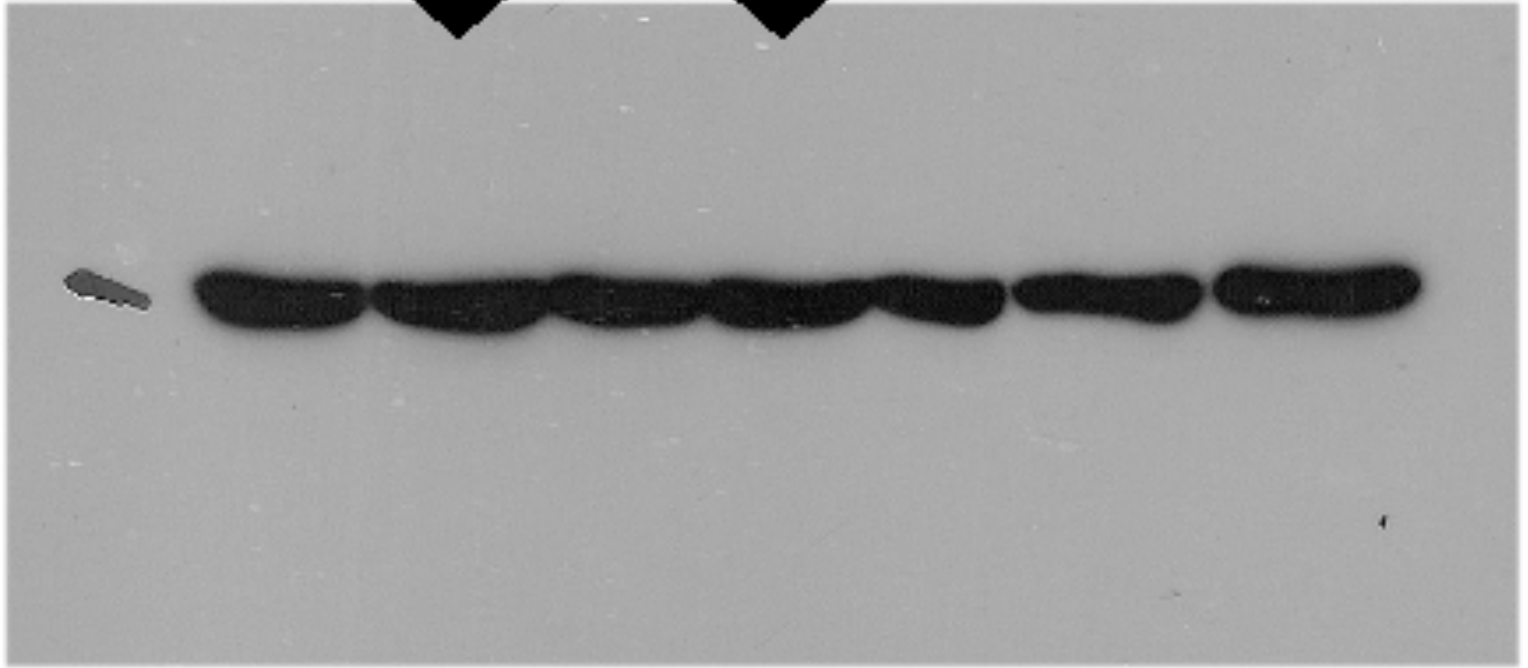

Supplement: emboj2013200df2a.pdf [file emboj2013200df2a.pdf]

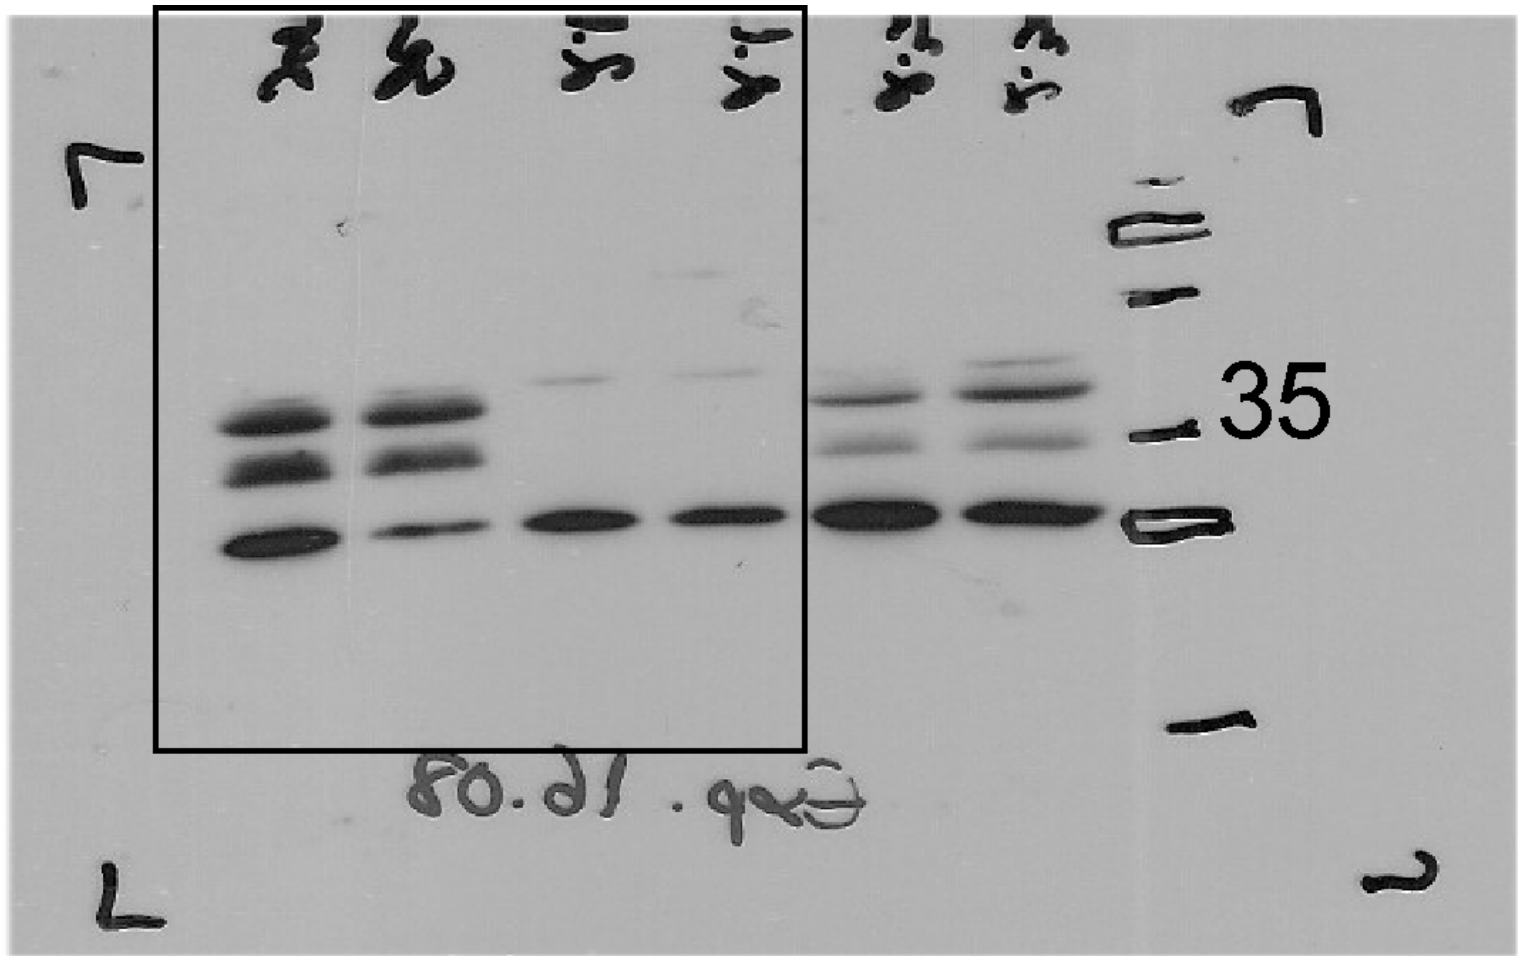

Exp. 10.08

35

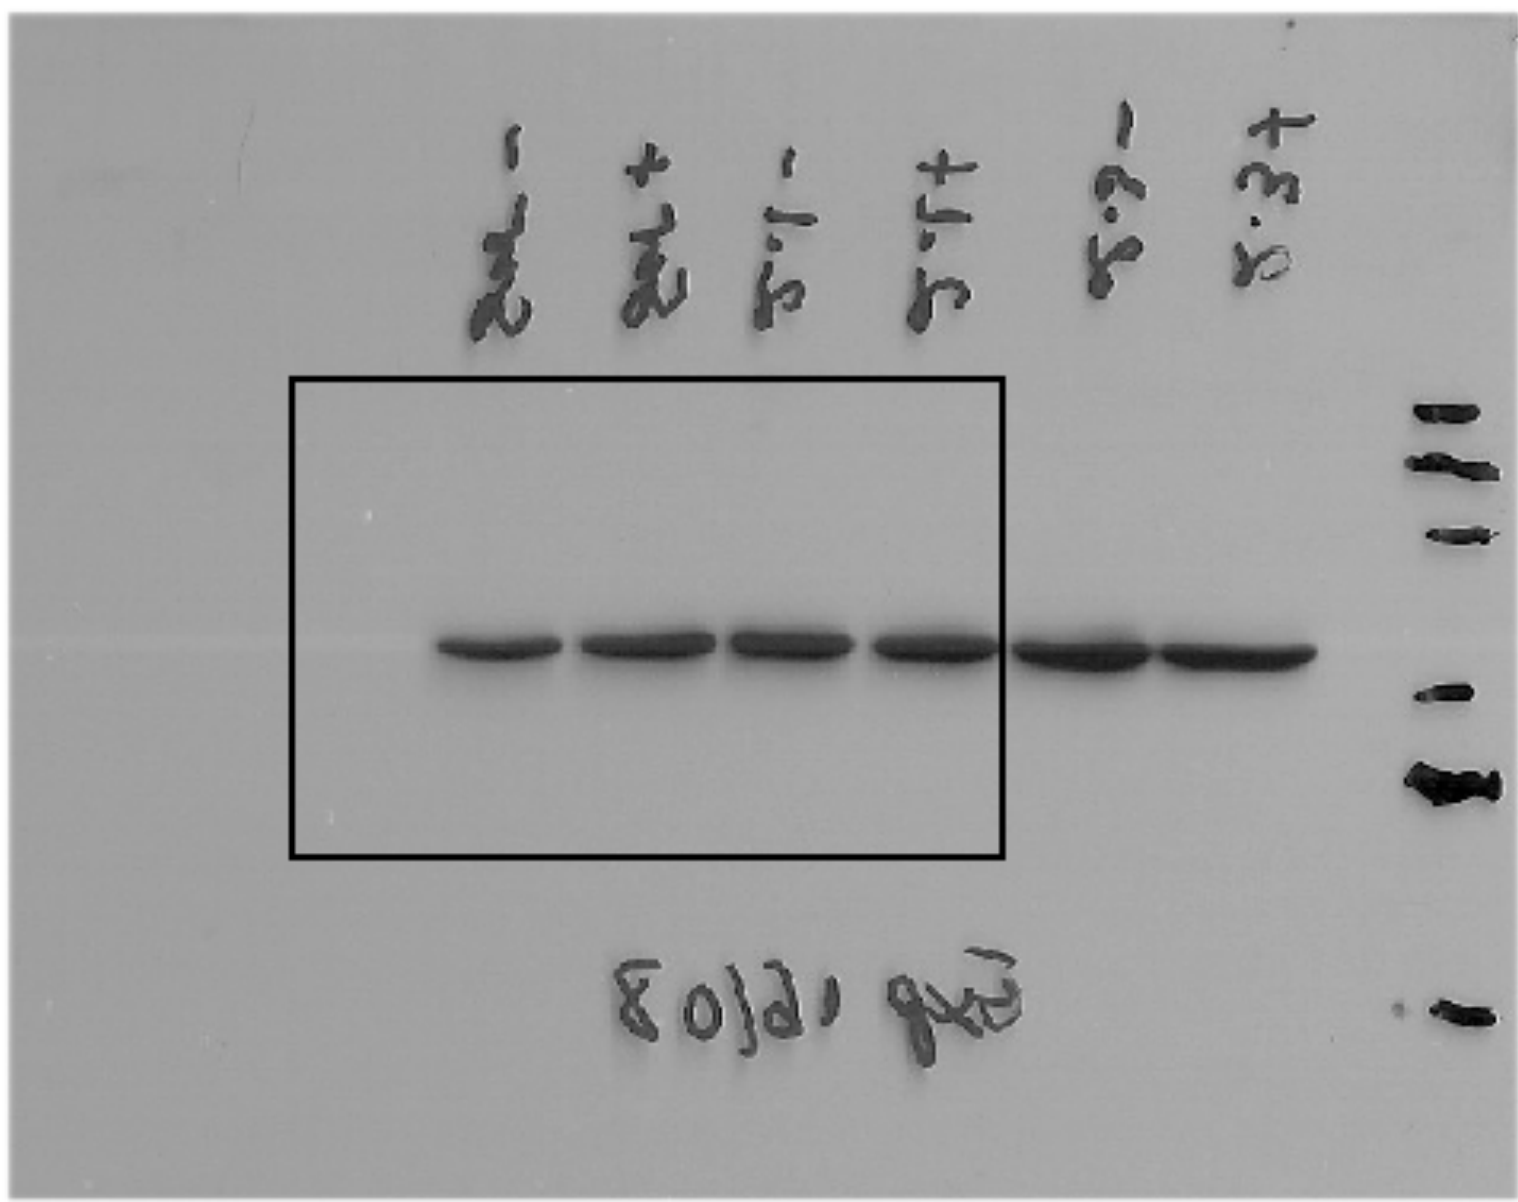

Supplement: emboj2013200df2d.pdf [file emboj2013200df2d.pdf]
